# Supplementary material for: Splenic Architecture and Function Requires Tight Control of Transmembrane TNF Expression
Source: Int J Mol Sci. 2022 Feb 17;23(4):2229. doi: 10.3390/ijms23042229 (PMC8876982; doi:10.3390/ijms23042229)
Supplement: Supplementary file 1 [file ijms-23-02229-s001.zip › Supplementary Figure 3.pdf]

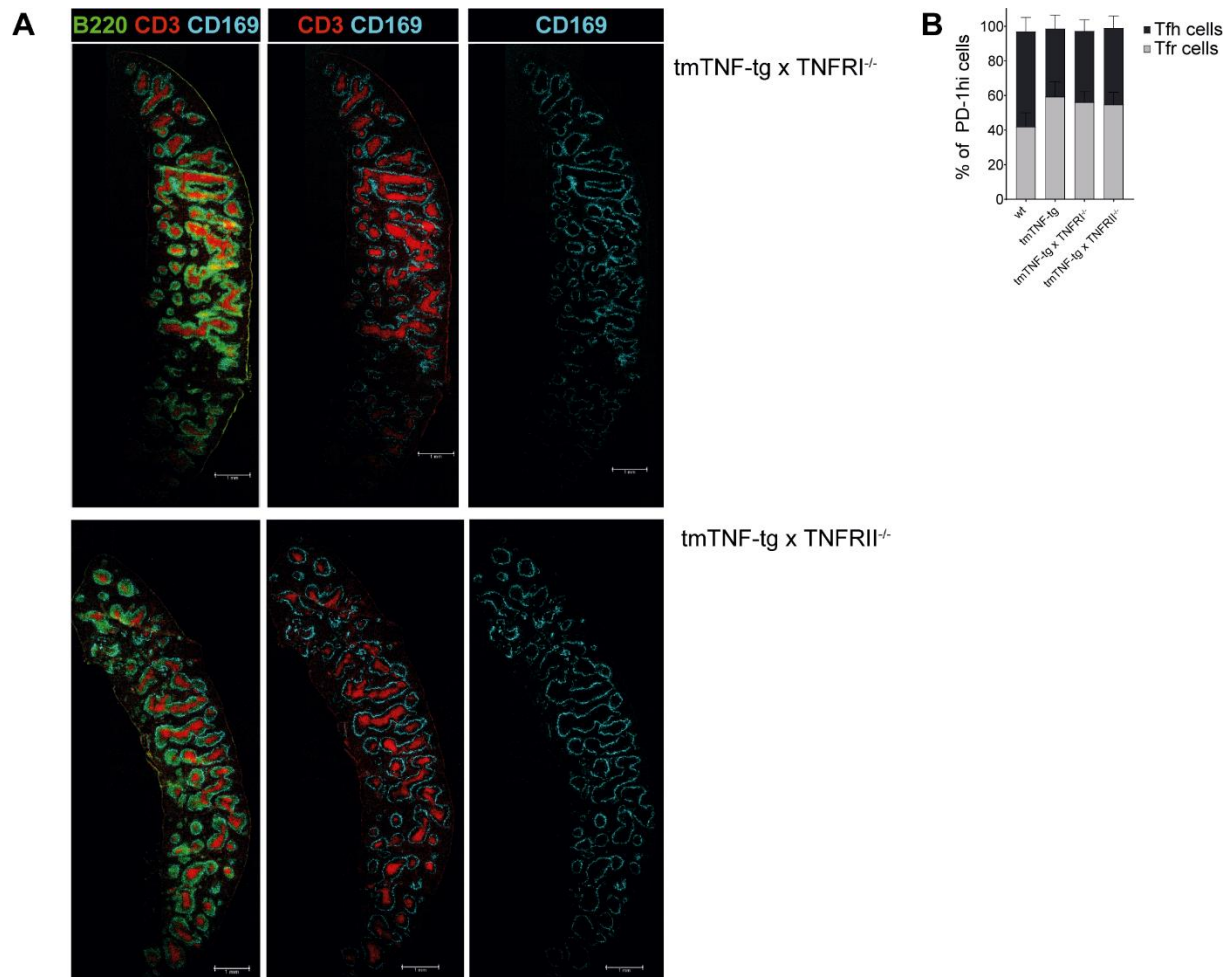

**Figure S3.** Splenic follicles in tmTNF-tg x TNFRI<sup>-/-</sup> and tmTNF-tg x TNFRII<sup>-/-</sup> spleen. (a) Representative overview images of tmTNF-tg x TNFRI<sup>-/-</sup> and tmTNF-tg x TNFRII<sup>-/-</sup> spleen.
